# Supplementary material for: Interfacial activity of patchy worm-like micelles
Source: Royal Society of Chemistry journal article supplement (doi:10.1039/c3sm51914g), 2013-01-01
Supplement: c3sm51914g.pdf [file c3sm51914g.pdf]

Electronic Supplementary Information to the Manuscript

## Interfacial activity of patchy worm-like micelles

by Joachim Schmelz, Daniela Pirner, Marina Krekhova, Thomas M. Ruhland,  
and Holger Schmalz\*

**Synthesis of triblock copolymers.** The used PE containing triblock co- and terpolymers were synthesized by catalytic hydrogenation of the corresponding PB containing block copolymers produced *via* sequential anionic polymerization in non-polar solvents, as can be found elsewhere.<sup>1, 2</sup> The preparation of the Janus cylinders used for comparison can be found in an earlier study.<sup>3</sup>

**Preparation of worm-like crystalline-core micelles (wCCMs).** Solutions of wCCMs in toluene or THF were prepared using the following procedure. The triblock copolymers were dissolved at a concentration of 1 g L<sup>-1</sup> and then heated in a water bath to at least 65 °C, *i.e.* above the melting temperature of PE, resulting in unimeric solutions. Subsequently, these solutions were quenched to the desired crystallization temperature ( $T_c$ , Table 1, main manuscript) to form the wCCMs and kept at this temperature for 24 h followed by an additional annealing step at the temperature  $T_a$  (Table 1, main manuscript) for 3 h to obtain a more regular patchy structure of the corona, as published earlier.<sup>1, 4</sup> In 1,4-dioxane, wCCM solutions were obtained by dialysis, as direct self-assembly in 1,4-dioxane results in the formation of spherical CCMs. Therefore, the samples were first prepared in THF as described above and then dialyzed against 1,4-dioxane for several days by replacing the solvent twice. Subsequently, the wCCM solutions in 1,4-dioxane were diluted to 1 g L<sup>-1</sup>. For all preparation steps gentle stirring or shaking was applied.

**Pendant-drop tensiometry.** Samples in toluene or 1,4-dioxane in a concentration range of 0.25 to 2 g L<sup>-1</sup> were measured using a Dataphysics OCA 20 tensiometer at room temperature. The drop profile was recorded using a CCD camera and the fitting was performed with the Dataphysics software package. The low-concentrated solutions were prepared from 1 g L<sup>-1</sup> solutions by dilution. The 2 g L<sup>-1</sup> solution was prepared directly as described above. For all measurements clean and dust-free glass cuvettes were used. The droplet phase (water in case of toluene, or perfluorooctane (PFO) in case of 1,4-dioxane) was generated with a manual dosage system using 1 mL syringes with straight blunt tip (diameter 0.8 mm). All measurements were performed at least twice to check the reproducibility. The quasi-equilibrium interfacial tension was determined by averaging the values of the interfacial tension measured during the last 30 min of the experiment.

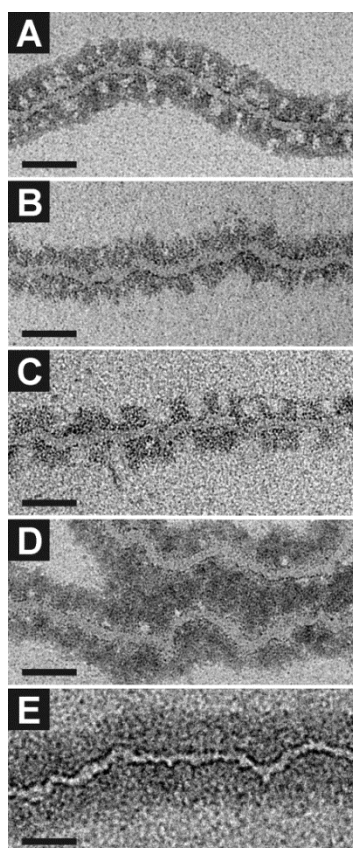

**Fig. S1** Selected TEM micrographs (scale bars = 50 nm) showing the corona structure of A) SEM1, B) SEM4, C) SEM5, D) SEM6 and E) SES wCCMs formed in toluene ( $1 \text{ g L}^{-1}$ ). For all samples PS was selectively stained by  $\text{RuO}_4$  vapour, resulting in dark PS domains. PMMA domains and the PE core appear bright. A more detailed characterization of the morphology can be found in our previous work.<sup>1,4</sup>

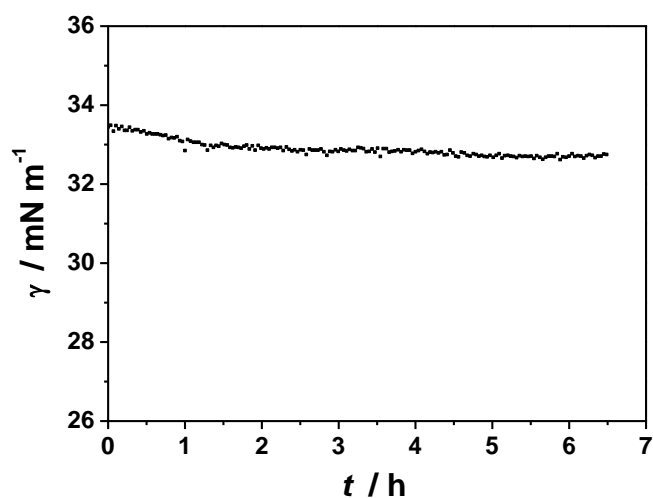

**Fig. S2** Interfacial tension isotherm of the pristine toluene/water interface.

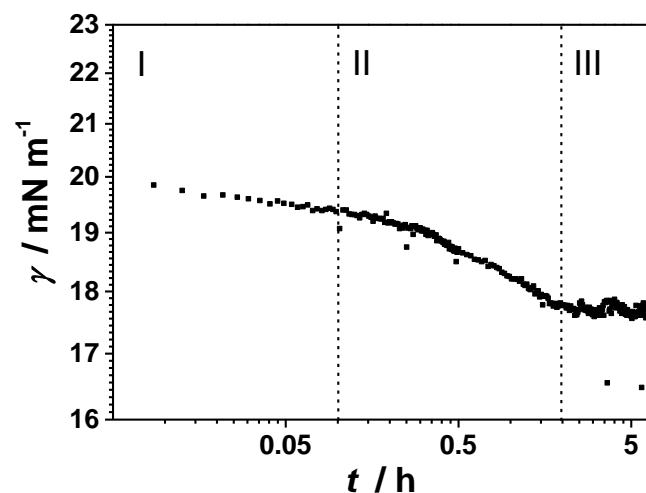

**Fig. S3** Logarithmic presentation of the adsorption isotherm of a  $1 \text{ g L}^{-1}$  solution of wCCMs formed by SEM1 at the toluene/water interface, revealing three stages of adsorption (cf. Fig. 1 main manuscript).

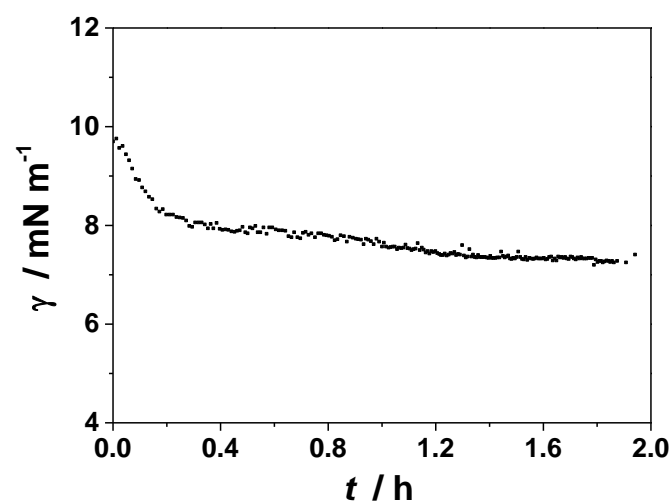

**Fig. S4** Interfacial tension isotherm of a  $1 \text{ g L}^{-1}$  solution of wCCMs formed by SEM1 at the dioxane/PFO interface ( $\gamma_0(\text{dioxane/PFO}) = 10.75 \text{ mN m}^{-1}$ ).

#### References:

- 1 J. Schmelz, M. Karg, T. Hellweg and H. Schmalz, *ACS Nano*, 2011, **5**, 9523-9534.
- 2 H. Ruckdäschel, J. K. W. Sandler, V. Altstädt, C. Rettig, H. Schmalz, V. Abetz and A. H. E. Müller, *Polymer*, 2006, **47**, 2772-2790.
- 3 T. M. Ruhland, A. H. Gröschel, A. Walther and A. H. E. Müller, *Langmuir*, 2011, **27**, 9807-9814.
- 4 J. Schmelz and H. Schmalz, *Polymer*, 2012, **53**, 4333-4337.
